# Supplementary material
Source: HighWire-hosted journal article supplement (https://bmjopen.bmj.com/content/12/4/e058053)
Supplement: inline-supplementary-material-1 [file inline-supplementary-material-1.pdf]

**Supplemental file 2**

1. “Intellectual disabilit\*”
2. “intellectual development disorder”
3. “learning disabilit\*”
4. “mental retardation”
5. “cerebral palsy”
6. “genetic syndrome”
7. “down syndrome”
8. “trisomy 21”
9. “autism spectrum disorder”
10. “autistic disorder”
11. “pervasive developmental disorder not otherwise specified”
12. “fetal alcohol syndrome”
13. “fragile X syndrome”
14. “Prader-Willi syndrome”
15. “Rett syndrome”
16. 1 OR 2 OR 3 OR 4 OR 5 OR 6 OR 7 OR 8 OR 9 OR 10 OR 11 OR 12 OR 13  
OR 14 OR 15
17. Exercise
18. “exercise therapy”
19. “physical activity”
20. fitness
21. training
22. sports
23. 17 OR 18 OR 19 OR 20 OR 21 OR 22

24. “physical conditioning”
25. “physical fitness”
26. “health-related fitness”
27. “skill-related fitness”
28. “cardiorespiratory fitness”
29. “body composition”
30. “weight loss”
31. Strength
32. Flexibility
33. Endurance
34. Speed
35. Agility
36. Balance
37. Power
38. “reaction time”
39. Coordination
40. Mobility
41. 24 OR 25 OR 26 OR 27 OR 28 OR 29 OR 30 OR 31 OR 32 OR 33 OR 34 OR  
35 OR 36 OR 37 OR 38 OR 39 OR 40
42. 16 AND 23 AND 41
43. Limit to systematic reviews AND metaanalysis
